# Supplementary material for: Establishment and verification of a prognostic model of liver cancer by RNA-binding proteins based on the TCGA database
Source: PubMed Central journal article supplement — Transl Cancer Res. 2022 Jul;11(7):1925–37. doi: 10.21037/tcr-21-2820 (PMC9560868; doi:10.21037/tcr-21-2820), 2022-07
Supplement: tcr-11-07-1925-supplementary.pdf [file tcr-11-07-1925-supplementary.pdf]

**Table S1 Differentially expressed RBPs between cancer tissues and normal tissues**

| <b>Gene</b>    | <b>conMean</b> | <b>treatMean</b> | <b>logFC</b> | <b>P value</b> | <b>fd</b>   |
|----------------|----------------|------------------|--------------|----------------|-------------|
| <i>TRIM71</i>  | 0.003          | 0.934            | 8.386        | 5.09E-13       | 3.42E-12    |
| <i>ZNF579</i>  | 1.742          | 2.948            | 0.759        | 1.58E-06       | 4.00E-06    |
| <i>MSI1</i>    | 0.249          | 2.386            | 3.260        | 0.0004428      | 0.000775333 |
| <i>MSI2</i>    | 0.906          | 1.311            | 0.532        | 3.83E-06       | 9.14E-06    |
| <i>RBMS1</i>   | 3.239          | 2.079            | -0.639       | 4.66E-11       | 2.18E-10    |
| <i>RBMS3</i>   | 1.008          | 0.349            | -1.529       | 9.54E-25       | 1.16E-22    |
| <i>RRP15</i>   | 1.715          | 2.452            | 0.516        | 1.45E-10       | 6.39E-10    |
| <i>LITD1</i>   | 0.038          | 0.024            | -0.666       | 0.002190676    | 0.003449095 |
| <i>NMD3</i>    | 16.239         | 10.196           | -0.671       | 9.16E-19       | 2.12E-17    |
| <i>SRSF12</i>  | 0.130          | 0.244            | 0.909        | 0.000268176    | 0.000490682 |
| <i>SRSF8</i>   | 11.487         | 5.910            | -0.959       | 1.36E-25       | 2.28E-23    |
| <i>DAP3</i>    | 17.342         | 25.103           | 0.534        | 3.54E-13       | 2.45E-12    |
| <i>TPR</i>     | 4.453          | 6.720            | 0.594        | 2.16E-10       | 9.11E-10    |
| <i>METTL3</i>  | 2.134          | 3.260            | 0.611        | 3.45E-17       | 5.39E-16    |
| <i>AKAP8L</i>  | 4.075          | 6.525            | 0.679        | 3.03E-16       | 3.99E-15    |
| <i>ELAVL2</i>  | 0.005          | 0.023            | 2.326        | 3.10E-08       | 1.02E-07    |
| <i>ELAVL3</i>  | 0.004          | 0.011            | 1.521        | 2.39E-05       | 5.06E-05    |
| <i>DDX41</i>   | 9.971          | 14.496           | 0.540        | 6.30E-17       | 9.50E-16    |
| <i>PUSL1</i>   | 2.698          | 4.249            | 0.656        | 1.52E-05       | 3.34E-05    |
| <i>CLASRP</i>  | 3.845          | 5.753            | 0.581        | 8.70E-12       | 4.58E-11    |
| <i>TOP3B</i>   | 0.031          | 0.057            | 0.874        | 1.91E-06       | 4.78E-06    |
| <i>SMG9</i>    | 1.295          | 2.690            | 1.055        | 3.94E-21       | 1.51E-19    |
| <i>MKRN3</i>   | 0.009          | 0.125            | 3.755        | 1.33E-09       | 5.13E-09    |
| <i>DHX57</i>   | 1.081          | 1.771            | 0.712        | 1.99E-21       | 8.36E-20    |
| <i>TCOF1</i>   | 1.717          | 3.318            | 0.950        | 7.06E-22       | 3.95E-20    |
| <i>MRPL53</i>  | 1.154          | 2.166            | 0.908        | 1.00E-16       | 1.44E-15    |
| <i>REPIN1</i>  | 18.589         | 28.559           | 0.620        | 6.47E-11       | 2.95E-10    |
| <i>ZC3H12C</i> | 1.180          | 0.649            | -0.862       | 2.88E-17       | 4.66E-16    |
| <i>ZC3H12A</i> | 7.119          | 4.489            | -0.665       | 1.81E-06       | 4.56E-06    |
| <i>TRMT61A</i> | 4.700          | 6.748            | 0.522        | 7.59E-08       | 2.37E-07    |
| <i>PABPNIL</i> | 0.017          | 0.009            | -0.995       | 0.000539355    | 0.000932244 |
| <i>TRMU</i>    | 1.519          | 2.665            | 0.811        | 9.06E-14       | 7.16E-13    |
| <i>CD3EAP</i>  | 0.726          | 1.046            | 0.526        | 2.91E-06       | 7.11E-06    |
| <i>RDM1</i>    | 0.042          | 0.465            | 3.453        | 4.60E-22       | 2.94E-20    |
| <i>XPO5</i>    | 2.269          | 4.129            | 0.864        | 8.39E-22       | 4.51E-20    |
| <i>GSPT2</i>   | 5.619          | 2.488            | -1.175       | 3.87E-19       | 9.44E-18    |
| <i>EIF2D</i>   | 4.746          | 7.140            | 0.589        | 1.77E-14       | 1.60E-13    |
| <i>DARS2</i>   | 4.980          | 8.328            | 0.742        | 4.00E-12       | 2.22E-11    |
| <i>SNRPD2</i>  | 39.977         | 62.484           | 0.644        | 1.16E-13       | 9.06E-13    |

|                |          |         |        |             |             |
|----------------|----------|---------|--------|-------------|-------------|
| <i>DICER1</i>  | 4.447    | 2.734   | -0.702 | 9.53E-18    | 1.71E-16    |
| <i>SAMD4B</i>  | 5.143    | 7.437   | 0.532  | 1.33E-16    | 1.89E-15    |
| <i>SAMD4A</i>  | 2.677    | 1.506   | -0.830 | 6.19E-16    | 7.36E-15    |
| <i>ENDOG</i>   | 11.893   | 7.107   | -0.743 | 4.11E-10    | 1.69E-09    |
| <i>EXO</i>     | 0.499    | 0.757   | 0.602  | 8.60E-11    | 3.85E-10    |
| <i>MRPL24</i>  | 48.445   | 76.309  | 0.655  | 1.11E-08    | 3.88E-08    |
| <i>CDC40</i>   | 2.820    | 1.807   | -0.642 | 5.11E-16    | 6.18E-15    |
| <i>RCL1</i>    | 22.401   | 7.423   | -1.594 | 3.57E-22    | 2.58E-20    |
| <i>ADAT2</i>   | 0.396    | 0.612   | 0.626  | 1.19E-06    | 3.08E-06    |
| <i>BOP1</i>    | 7.519    | 19.148  | 1.349  | 1.77E-17    | 3.07E-16    |
| <i>POLR1E</i>  | 12.335   | 6.423   | -0.941 | 9.23E-22    | 4.56E-20    |
| <i>ZC3H3</i>   | 4.504    | 9.182   | 1.027  | 1.28E-17    | 2.26E-16    |
| <i>NELFE</i>   | 11.002   | 24.951  | 1.181  | 2.15E-21    | 8.76E-20    |
| <i>APOBEC2</i> | 0.049    | 0.147   | 1.574  | 5.70E-06    | 1.33E-05    |
| <i>PATL1</i>   | 12.690   | 8.706   | -0.544 | 1.86E-12    | 1.12E-11    |
| <i>EDC3</i>    | 2.502    | 3.989   | 0.673  | 1.78E-20    | 5.55E-19    |
| <i>EIF5A</i>   | 164.092  | 100.990 | -0.700 | 8.54E-20    | 2.34E-18    |
| <i>EIF5A2</i>  | 0.522    | 1.199   | 1.201  | 0.022971158 | 0.030850266 |
| <i>DAZ3</i>    | 0.000    | 0.000   | -0.691 | 5.14E-05    | 0.000102347 |
| <i>SPATS2</i>  | 0.877    | 2.408   | 1.457  | 1.85E-26    | 4.97E-24    |
| <i>MAEL</i>    | 0.075    | 1.139   | 3.930  | 0.011105226 | 0.015715825 |
| <i>TIPARP</i>  | 8.486    | 4.186   | -1.020 | 2.02E-16    | 2.83E-15    |
| <i>POLR2J3</i> | 0.148    | 0.212   | 0.513  | 0.001383994 | 0.002242304 |
| <i>ZCCHC14</i> | 7.743    | 5.359   | -0.531 | 4.17E-11    | 1.96E-10    |
| <i>ZCCHC2</i>  | 4.516    | 2.524   | -0.839 | 4.90E-20    | 1.46E-18    |
| <i>LARS</i>    | 5.030    | 7.651   | 0.605  | 3.06E-19    | 7.61E-18    |
| <i>TSEN15</i>  | 5.808    | 8.342   | 0.522  | 3.31E-10    | 1.38E-09    |
| <i>LSM4</i>    | 18.773   | 31.116  | 0.729  | 2.89E-14    | 2.50E-13    |
| <i>MRPL34</i>  | 54.561   | 34.818  | -0.648 | 7.95E-16    | 9.13E-15    |
| <i>SUGP2</i>   | 1.993    | 3.297   | 0.726  | 6.32E-15    | 6.15E-14    |
| <i>DDX49</i>   | 10.646   | 16.763  | 0.655  | 2.45E-17    | 4.11E-16    |
| <i>SFSWAP</i>  | 1.708    | 2.605   | 0.609  | 1.49E-19    | 3.76E-18    |
| <i>MRPS12</i>  | 13.413   | 19.217  | 0.519  | 3.53E-06    | 8.52E-06    |
| <i>EXOSC4</i>  | 15.428   | 23.598  | 0.613  | 0.000410247 | 0.000721155 |
| <i>EXOSC6</i>  | 5.631    | 3.880   | -0.537 | 3.51E-12    | 2.01E-11    |
| <i>PTRH1</i>   | 0.011    | 0.018   | 0.803  | 0.001776374 | 0.002853672 |
| <i>INTS8</i>   | 1.549    | 2.897   | 0.903  | 9.74E-19    | 2.22E-17    |
| <i>CASC3</i>   | 6.003    | 8.809   | 0.553  | 1.86E-15    | 2.00E-14    |
| <i>MRPL54</i>  | 58.416   | 38.487  | -0.602 | 9.91E-16    | 1.13E-14    |
| <i>GTPBP3</i>  | 2.201    | 3.196   | 0.538  | 2.79E-13    | 2.01E-12    |
| <i>AZGP1</i>   | 1007.151 | 313.722 | -1.683 | 4.02E-25    | 6.00E-23    |

|                |         |         |        |             |             |
|----------------|---------|---------|--------|-------------|-------------|
| <i>NSUN6</i>   | 14.592  | 6.132   | -1.251 | 3.54E-22    | 2.58E-20    |
| <i>RRP9</i>    | 7.790   | 11.836  | 0.603  | 1.69E-12    | 1.02E-11    |
| <i>PUS1</i>    | 2.953   | 4.447   | 0.590  | 3.89E-08    | 1.26E-07    |
| <i>TDRKH</i>   | 1.022   | 2.187   | 1.097  | 5.76E-14    | 4.74E-13    |
| <i>RBM44</i>   | 0.032   | 0.048   | 0.575  | 0.002634192 | 0.00408985  |
| <i>OASL</i>    | 19.321  | 6.980   | -1.469 | 0.005959008 | 0.008727315 |
| <i>OAS1</i>    | 16.819  | 8.475   | -0.989 | 1.16E-06    | 3.01E-06    |
| <i>OAS2</i>    | 15.381  | 5.767   | -1.415 | 0.000271684 | 0.000496424 |
| <i>RPP14</i>   | 3.134   | 2.166   | -0.533 | 4.15E-16    | 5.26E-15    |
| <i>TRMT6</i>   | 2.302   | 3.438   | 0.579  | 2.05E-14    | 1.81E-13    |
| <i>PRPF3</i>   | 3.191   | 6.108   | 0.937  | 5.26E-21    | 1.87E-19    |
| <i>ZCCHC24</i> | 16.528  | 7.176   | -1.204 | 1.15E-20    | 3.69E-19    |
| <i>RPS21</i>   | 177.923 | 255.375 | 0.521  | 7.22E-13    | 4.75E-12    |
| <i>MBNL2</i>   | 29.256  | 10.424  | -1.489 | 3.78E-18    | 7.70E-17    |
| <i>ALYREF</i>  | 16.331  | 24.698  | 0.597  | 1.14E-07    | 3.43E-07    |
| <i>PUS7</i>    | 1.674   | 2.518   | 0.589  | 1.59E-09    | 6.06E-09    |
| <i>NOL3</i>    | 4.043   | 6.921   | 0.776  | 2.58E-05    | 5.45E-05    |
| <i>SMAD1</i>   | 2.385   | 1.353   | -0.818 | 4.38E-13    | 2.99E-12    |
| <i>SMAD7</i>   | 4.268   | 2.781   | -0.618 | 5.10E-11    | 2.36E-10    |
| <i>SMAD6</i>   | 1.440   | 0.711   | -1.018 | 6.68E-18    | 1.28E-16    |
| <i>PRPF39</i>  | 1.705   | 2.453   | 0.525  | 6.32E-11    | 2.89E-10    |
| <i>ADAD2</i>   | 0.036   | 0.024   | -0.606 | 1.69E-08    | 5.75E-08    |
| <i>CLK2</i>    | 4.269   | 8.393   | 0.975  | 5.30E-22    | 3.09E-20    |
| <i>IGF2BP1</i> | 0.014   | 1.584   | 6.862  | 2.97E-15    | 3.10E-14    |
| <i>IGF2BP2</i> | 0.802   | 3.540   | 2.142  | 1.28E-05    | 2.85E-05    |
| <i>IGF2BP3</i> | 0.018   | 0.413   | 4.529  | 6.03E-11    | 2.77E-10    |
| <i>UBAP2</i>   | 1.339   | 1.936   | 0.532  | 3.02E-11    | 1.46E-10    |
| <i>UBAP2L</i>  | 7.476   | 14.046  | 0.910  | 1.62E-21    | 7.02E-20    |
| <i>SNRPE</i>   | 18.597  | 35.039  | 0.914  | 3.52E-21    | 1.39E-19    |
| <i>NSUN5</i>   | 4.250   | 7.220   | 0.765  | 3.74E-18    | 7.70E-17    |
| <i>MTG1</i>    | 1.303   | 1.946   | 0.579  | 3.64E-06    | 8.77E-06    |
| <i>RPUSD1</i>  | 3.992   | 5.996   | 0.587  | 1.77E-11    | 8.96E-11    |
| <i>NHP2</i>    | 18.346  | 26.757  | 0.544  | 1.67E-12    | 1.02E-11    |
| <i>SUB1</i>    | 10.405  | 15.100  | 0.537  | 1.57E-09    | 6.02E-09    |
| <i>PARP1</i>   | 13.185  | 19.127  | 0.537  | 1.05E-08    | 3.65E-08    |
| <i>SF3A2</i>   | 9.192   | 15.878  | 0.789  | 1.44E-14    | 1.33E-13    |
| <i>AFF1</i>    | 6.084   | 3.888   | -0.646 | 6.85E-14    | 5.58E-13    |
| <i>AFF4</i>    | 12.815  | 7.253   | -0.821 | 2.25E-16    | 3.09E-15    |
| <i>AFF2</i>    | 0.005   | 0.103   | 4.386  | 0.000258649 | 0.000473895 |
| <i>SNRPD1</i>  | 3.991   | 6.100   | 0.612  | 1.39E-09    | 5.35E-09    |
| <i>SNRPC</i>   | 38.362  | 63.519  | 0.727  | 5.91E-20    | 1.69E-18    |

|                |         |         |        |             |             |
|----------------|---------|---------|--------|-------------|-------------|
| <i>RBM3</i>    | 18.512  | 32.218  | 0.799  | 8.01E-13    | 5.20E-12    |
| <i>CNOT7</i>   | 4.968   | 3.343   | -0.572 | 1.94E-14    | 1.72E-13    |
| <i>AICF</i>    | 41.564  | 18.925  | -1.135 | 5.07E-21    | 1.87E-19    |
| <i>RBM47</i>   | 11.539  | 7.324   | -0.656 | 2.31E-12    | 1.36E-11    |
| <i>GPATCH4</i> | 4.649   | 7.738   | 0.735  | 1.55E-14    | 1.41E-13    |
| <i>RBM20</i>   | 0.042   | 0.118   | 1.488  | 0.000320953 | 0.000573191 |
| <i>KHDC1</i>   | 0.020   | 0.068   | 1.757  | 0.018818945 | 0.025737111 |
| <i>RPL10L</i>  | 0.013   | 0.402   | 4.935  | 0.000961695 | 0.001598427 |
| <i>EPRS</i>    | 11.271  | 17.845  | 0.663  | 1.60E-13    | 1.19E-12    |
| <i>DHX58</i>   | 7.448   | 4.622   | -0.688 | 4.15E-09    | 1.52E-08    |
| <i>DDX58</i>   | 5.363   | 3.510   | -0.612 | 0.000102145 | 0.000197667 |
| <i>IFIH1</i>   | 6.737   | 4.385   | -0.619 | 0.000180141 | 0.000336949 |
| <i>TEX13A</i>  | 0.001   | 0.001   | -0.658 | 2.12E-05    | 4.52E-05    |
| <i>BARD1</i>   | 0.300   | 0.618   | 1.043  | 3.56E-12    | 2.02E-11    |
| <i>RUVBL1</i>  | 2.916   | 4.172   | 0.517  | 1.67E-12    | 1.02E-11    |
| <i>INTS10</i>  | 8.634   | 4.570   | -0.918 | 5.14E-22    | 3.09E-20    |
| <i>RANBP6</i>  | 4.993   | 3.472   | -0.524 | 7.28E-14    | 5.89E-13    |
| <i>DNMT3B</i>  | 0.235   | 0.630   | 1.426  | 5.13E-15    | 5.03E-14    |
| <i>RNASE9</i>  | 0.001   | 0.000   | -0.895 | 0.000918916 | 0.001534956 |
| <i>TDRD15</i>  | 0.101   | 0.061   | -0.733 | 3.12E-08    | 1.02E-07    |
| <i>WDR4</i>    | 1.711   | 3.037   | 0.828  | 1.46E-13    | 1.11E-12    |
| <i>ILF2</i>    | 30.609  | 55.891  | 0.869  | 1.10E-21    | 5.11E-20    |
| <i>ILF3</i>    | 7.196   | 12.088  | 0.748  | 4.37E-22    | 2.94E-20    |
| <i>TCERG1</i>  | 1.691   | 2.663   | 0.655  | 1.52E-15    | 1.64E-14    |
| <i>NXF3</i>    | 0.406   | 0.047   | -3.105 | 2.71E-27    | 1.82E-24    |
| <i>RRS1</i>    | 9.518   | 15.775  | 0.729  | 6.07E-07    | 1.64E-06    |
| <i>PRKDC</i>   | 3.808   | 6.322   | 0.731  | 1.88E-09    | 7.12E-09    |
| <i>FASTK</i>   | 16.215  | 23.048  | 0.507  | 8.72E-10    | 3.46E-09    |
| <i>ACO1</i>    | 36.508  | 20.874  | -0.806 | 3.53E-16    | 4.52E-15    |
| <i>PCBP4</i>   | 3.335   | 6.599   | 0.984  | 2.12E-14    | 1.86E-13    |
| <i>UNK</i>     | 2.487   | 3.903   | 0.650  | 1.15E-15    | 1.29E-14    |
| <i>UNKL</i>    | 0.600   | 1.100   | 0.874  | 3.41E-10    | 1.42E-09    |
| <i>CNBP</i>    | 217.922 | 127.607 | -0.772 | 1.15E-19    | 3.09E-18    |
| <i>PAIP2B</i>  | 6.151   | 2.247   | -1.453 | 2.15E-20    | 6.56E-19    |
| <i>DDX39A</i>  | 5.511   | 13.715  | 1.315  | 3.65E-22    | 2.58E-20    |
| <i>DDX39B</i>  | 3.235   | 6.351   | 0.973  | 3.60E-11    | 1.72E-10    |
| <i>DHX37</i>   | 2.064   | 3.032   | 0.555  | 7.56E-13    | 4.96E-12    |
| <i>RNASE3</i>  | 0.049   | 0.017   | -1.515 | 1.97E-07    | 5.80E-07    |
| <i>RNASE4</i>  | 16.677  | 7.135   | -1.225 | 8.04E-20    | 2.25E-18    |
| <i>ANG</i>     | 725.009 | 304.039 | -1.254 | 8.33E-18    | 1.55E-16    |
| <i>RBMXL1</i>  | 4.535   | 2.281   | -0.991 | 5.37E-20    | 1.57E-18    |

|                 |         |        |        |             |            |
|-----------------|---------|--------|--------|-------------|------------|
| <i>PRR3</i>     | 1.566   | 2.511  | 0.681  | 1.69E-12    | 1.02E-11   |
| <i>RPL26</i>    | 92.857  | 63.332 | -0.552 | 1.51E-13    | 1.14E-12   |
| <i>EIF3CL</i>   | 0.036   | 0.056  | 0.652  | 0.003734271 | 0.00560976 |
| <i>G3BP2</i>    | 11.878  | 8.371  | -0.505 | 2.83E-12    | 1.65E-11   |
| <i>DHX34</i>    | 1.934   | 4.062  | 1.070  | 1.03E-22    | 8.61E-21   |
| <i>SRRM3</i>    | 0.054   | 0.592  | 3.450  | 4.70E-06    | 1.11E-05   |
| <i>CSDC2</i>    | 0.372   | 0.158  | -1.232 | 3.38E-12    | 1.94E-11   |
| <i>RNPC3</i>    | 0.530   | 0.881  | 0.732  | 8.48E-09    | 3.02E-08   |
| <i>TRIM25</i>   | 3.120   | 5.254  | 0.752  | 1.02E-11    | 5.35E-11   |
| <i>DDX19B</i>   | 4.956   | 2.663  | -0.896 | 8.91E-22    | 4.56E-20   |
| <i>BZW2</i>     | 5.160   | 7.617  | 0.562  | 3.25E-07    | 9.11E-07   |
| <i>BZW1</i>     | 17.760  | 10.691 | -0.732 | 3.34E-18    | 7.05E-17   |
| <i>ZFP36</i>    | 297.957 | 65.405 | -2.188 | 6.14E-24    | 6.34E-22   |
| <i>ZFP36L1</i>  | 103.993 | 44.979 | -1.209 | 5.28E-21    | 1.87E-19   |
| <i>ZFP36L2</i>  | 49.671  | 32.724 | -0.602 | 7.37E-07    | 1.97E-06   |
| <i>DROSHA</i>   | 2.656   | 3.812  | 0.521  | 4.26E-16    | 5.30E-15   |
| <i>MRPL37</i>   | 52.854  | 35.723 | -0.565 | 6.41E-17    | 9.54E-16   |
| <i>PUS10</i>    | 2.146   | 1.218  | -0.816 | 1.69E-18    | 3.72E-17   |
| <i>TRMT11</i>   | 5.766   | 3.617  | -0.673 | 1.28E-12    | 8.01E-12   |
| <i>THOC5</i>    | 1.765   | 2.803  | 0.667  | 8.33E-14    | 6.66E-13   |
| <i>TSEN54</i>   | 3.953   | 7.535  | 0.931  | 6.41E-19    | 1.51E-17   |
| <i>TARBP1</i>   | 1.213   | 3.945  | 1.702  | 1.19E-25    | 2.28E-23   |
| <i>AGO2</i>     | 0.931   | 1.753  | 0.914  | 5.34E-14    | 4.45E-13   |
| <i>AGO3</i>     | 0.650   | 0.459  | -0.502 | 3.28E-14    | 2.81E-13   |
| <i>LARP4</i>    | 13.792  | 8.560  | -0.688 | 7.80E-17    | 1.14E-15   |
| <i>EZH2</i>     | 0.567   | 2.625  | 2.212  | 1.33E-26    | 4.47E-24   |
| <i>SNRPA</i>    | 11.780  | 17.295 | 0.554  | 2.86E-12    | 1.66E-11   |
| <i>HEATR1</i>   | 1.479   | 2.600  | 0.814  | 2.63E-13    | 1.91E-12   |
| <i>AARSD1</i>   | 0.670   | 0.998  | 0.576  | 1.68E-10    | 7.22E-10   |
| <i>INTS3</i>    | 2.691   | 4.187  | 0.638  | 2.13E-08    | 7.14E-08   |
| <i>EIF2AK4</i>  | 5.369   | 3.590  | -0.581 | 1.47E-13    | 1.11E-12   |
| <i>QKI</i>      | 5.039   | 3.339  | -0.594 | 7.89E-16    | 9.13E-15   |
| <i>IPO9</i>     | 3.528   | 5.567  | 0.658  | 1.55E-14    | 1.41E-13   |
| <i>CPSF4</i>    | 3.125   | 5.179  | 0.729  | 4.26E-16    | 5.30E-15   |
| <i>CSTF2</i>    | 2.328   | 4.064  | 0.804  | 2.46E-16    | 3.27E-15   |
| <i>PPARGC1A</i> | 11.658  | 5.270  | -1.145 | 6.01E-12    | 3.24E-11   |
| <i>ZC3H13</i>   | 5.556   | 3.800  | -0.548 | 4.17E-11    | 1.96E-10   |
| <i>UPF3B</i>    | 2.192   | 3.907  | 0.833  | 5.31E-18    | 1.05E-16   |
| <i>RBM24</i>    | 0.341   | 1.766  | 2.372  | 1.66E-10    | 7.20E-10   |
| <i>IGHMBP2</i>  | 1.984   | 3.185  | 0.683  | 4.32E-05    | 8.69E-05   |
| <i>VARS</i>     | 11.334  | 17.383 | 0.617  | 1.15E-12    | 7.23E-12   |

|                |        |         |        |             |             |
|----------------|--------|---------|--------|-------------|-------------|
| <i>INTS7</i>   | 3.445  | 5.097   | 0.565  | 3.82E-10    | 1.58E-09    |
| <i>ATXN2L</i>  | 7.527  | 10.852  | 0.528  | 7.14E-10    | 2.87E-09    |
| <i>PPILA</i>   | 6.992  | 4.400   | -0.668 | 6.47E-17    | 9.54E-16    |
| <i>LSM11</i>   | 0.546  | 0.852   | 0.642  | 1.61E-09    | 6.12E-09    |
| <i>AARS2</i>   | 2.819  | 4.708   | 0.740  | 6.40E-19    | 1.51E-17    |
| <i>RNF17</i>   | 0.002  | 0.096   | 5.633  | 0.007036041 | 0.010215571 |
| <i>TDRD1</i>   | 0.095  | 0.063   | -0.601 | 3.22E-13    | 2.28E-12    |
| <i>ENOX1</i>   | 0.099  | 0.299   | 1.599  | 0.002324389 | 0.003646792 |
| <i>CMTR2</i>   | 2.655  | 1.577   | -0.752 | 1.09E-20    | 3.56E-19    |
| <i>TRMT1</i>   | 5.337  | 9.065   | 0.764  | 9.18E-18    | 1.67E-16    |
| <i>GPATCH1</i> | 1.456  | 2.131   | 0.549  | 2.67E-13    | 1.93E-12    |
| <i>EEF1A2</i>  | 3.298  | 50.561  | 3.938  | 2.06E-05    | 4.41E-05    |
| <i>R3HDM1</i>  | 1.494  | 2.210   | 0.565  | 1.31E-15    | 1.45E-14    |
| <i>METTL14</i> | 3.576  | 2.519   | -0.506 | 9.98E-16    | 1.13E-14    |
| <i>MRPL32</i>  | 15.513 | 9.887   | -0.650 | 7.95E-21    | 2.67E-19    |
| <i>WDR46</i>   | 10.188 | 14.902  | 0.549  | 1.82E-14    | 1.64E-13    |
| <i>CMSS1</i>   | 2.344  | 3.364   | 0.521  | 1.00E-09    | 3.94E-09    |
| <i>UTP14A</i>  | 2.717  | 4.079   | 0.586  | 2.34E-13    | 1.71E-12    |
| <i>UTP14C</i>  | 4.402  | 2.876   | -0.614 | 4.89E-13    | 3.32E-12    |
| <i>TRUB2</i>   | 11.419 | 7.916   | -0.529 | 8.71E-15    | 8.30E-14    |
| <i>PRIM1</i>   | 1.466  | 3.351   | 1.193  | 2.29E-14    | 2.00E-13    |
| <i>CPSF1</i>   | 8.618  | 13.818  | 0.681  | 4.12E-12    | 2.28E-11    |
| <i>DDX3X</i>   | 30.991 | 16.963  | -0.869 | 6.74E-16    | 7.95E-15    |
| <i>NOP56</i>   | 7.164  | 11.728  | 0.711  | 5.23E-13    | 3.49E-12    |
| <i>MRM1</i>    | 3.039  | 4.507   | 0.569  | 6.67E-08    | 2.08E-07    |
| <i>DXO</i>     | 4.080  | 7.222   | 0.824  | 3.90E-17    | 6.01E-16    |
| <i>NOL12</i>   | 0.549  | 1.089   | 0.989  | 2.75E-17    | 4.50E-16    |
| <i>DNMT1</i>   | 1.798  | 3.921   | 1.125  | 4.46E-16    | 5.49E-15    |
| <i>SNRPA1</i>  | 3.899  | 5.668   | 0.540  | 9.89E-08    | 3.02E-07    |
| <i>PUF60</i>   | 22.628 | 35.362  | 0.644  | 2.45E-11    | 1.21E-10    |
| <i>EIF5</i>    | 35.759 | 20.219  | -0.823 | 1.19E-19    | 3.12E-18    |
| <i>RALY</i>    | 9.027  | 13.639  | 0.595  | 3.88E-15    | 3.94E-14    |
| <i>SEPSECS</i> | 9.925  | 5.196   | -0.934 | 6.52E-21    | 2.25E-19    |
| <i>NPM1</i>    | 55.051 | 82.024  | 0.575  | 6.00E-10    | 2.43E-09    |
| <i>NPM3</i>    | 7.705  | 13.268  | 0.784  | 1.41E-06    | 3.60E-06    |
| <i>NPM2</i>    | 0.623  | 2.061   | 1.725  | 0.03460622  | 0.045298395 |
| <i>NUPL2</i>   | 2.716  | 3.916   | 0.528  | 2.09E-17    | 3.56E-16    |
| <i>SNRPB</i>   | 54.629 | 110.294 | 1.014  | 9.50E-22    | 4.56E-20    |
| <i>POLR2K</i>  | 17.423 | 28.326  | 0.701  | 5.36E-14    | 4.45E-13    |
| <i>MRPL13</i>  | 7.425  | 10.788  | 0.539  | 3.90E-05    | 7.91E-05    |
| <i>MRPL46</i>  | 5.164  | 3.204   | -0.689 | 3.43E-15    | 3.55E-14    |

|                  |         |         |        |             |             |
|------------------|---------|---------|--------|-------------|-------------|
| <i>TTF2</i>      | 0.368   | 0.621   | 0.756  | 1.44E-10    | 6.33E-10    |
| <i>PUS3</i>      | 13.430  | 8.939   | -0.587 | 3.53E-15    | 3.62E-14    |
| <i>RBM7</i>      | 3.154   | 1.753   | -0.848 | 9.70E-26    | 2.17E-23    |
| <i>UTP3</i>      | 16.104  | 9.953   | -0.694 | 1.24E-16    | 1.77E-15    |
| <i>WDR83</i>     | 1.937   | 2.971   | 0.617  | 6.93E-09    | 2.50E-08    |
| <i>SNRNP70</i>   | 18.700  | 28.963  | 0.631  | 7.63E-13    | 4.97E-12    |
| <i>MRPL39</i>    | 22.690  | 13.415  | -0.758 | 9.21E-24    | 8.84E-22    |
| <i>TLR8</i>      | 0.548   | 0.280   | -0.967 | 2.30E-10    | 9.69E-10    |
| <i>TLR3</i>      | 2.550   | 1.093   | -1.222 | 2.08E-18    | 4.51E-17    |
| <i>BRCA1</i>     | 0.581   | 0.893   | 0.621  | 0.000274165 | 0.000499598 |
| <i>DQX1</i>      | 0.012   | 0.735   | 5.957  | 2.98E-07    | 8.38E-07    |
| <i>TDRD12</i>    | 0.008   | 0.019   | 1.208  | 0.006641372 | 0.009673929 |
| <i>ZNF473</i>    | 0.755   | 1.107   | 0.552  | 2.50E-12    | 1.47E-11    |
| <i>CELF3</i>     | 0.001   | 0.021   | 4.308  | 2.32E-11    | 1.15E-10    |
| <i>DDX53</i>     | 0.001   | 0.178   | 8.267  | 7.07E-05    | 0.000138462 |
| <i>CPEB2</i>     | 4.818   | 3.012   | -0.678 | 1.41E-11    | 7.22E-11    |
| <i>CPEB3</i>     | 6.863   | 1.341   | -2.356 | 6.70E-28    | 9.00E-25    |
| <i>CPEB4</i>     | 10.356  | 5.194   | -0.996 | 5.98E-17    | 9.13E-16    |
| <i>SECISBP2L</i> | 4.784   | 3.208   | -0.577 | 3.72E-13    | 2.56E-12    |
| <i>EEF1E1</i>    | 2.305   | 3.422   | 0.570  | 1.16E-05    | 2.59E-05    |
| <i>IARS</i>      | 5.382   | 7.828   | 0.540  | 1.02E-08    | 3.57E-08    |
| <i>DDX60</i>     | 5.232   | 2.897   | -0.853 | 0.000291101 | 0.000525469 |
| <i>DDX60L</i>    | 1.668   | 0.960   | -0.797 | 1.54E-10    | 6.71E-10    |
| <i>MAZ</i>       | 6.594   | 10.689  | 0.697  | 1.16E-11    | 5.98E-11    |
| <i>PABPC3</i>    | 0.054   | 0.113   | 1.053  | 3.68E-05    | 7.50E-05    |
| <i>PABPC1L</i>   | 1.421   | 4.403   | 1.632  | 2.28E-16    | 3.09E-15    |
| <i>PABPC1L2B</i> | 0.001   | 0.001   | -0.551 | 0.00062898  | 0.001073342 |
| <i>PABPC4L</i>   | 0.039   | 0.102   | 1.404  | 3.97E-12    | 2.21E-11    |
| <i>PABPC1</i>    | 114.271 | 181.907 | 0.671  | 1.30E-06    | 3.34E-06    |
| <i>MEX3A</i>     | 0.340   | 1.061   | 1.643  | 6.32E-12    | 3.38E-11    |
| <i>MEX3B</i>     | 0.211   | 0.316   | 0.585  | 0.013185714 | 0.018446264 |
| <i>MRPS23</i>    | 3.383   | 5.492   | 0.699  | 1.66E-18    | 3.71E-17    |
| <i>RPL39L</i>    | 1.990   | 5.665   | 1.510  | 0.006676626 | 0.009714744 |
| <i>RPSA</i>      | 62.485  | 91.823  | 0.555  | 3.54E-11    | 1.70E-10    |
| <i>SMG5</i>      | 11.241  | 26.023  | 1.211  | 1.44E-21    | 6.45E-20    |
| <i>NR0B1</i>     | 0.003   | 0.339   | 6.906  | 0.012890135 | 0.018051566 |
| <i>FUS</i>       | 9.632   | 14.291  | 0.569  | 5.68E-12    | 3.08E-11    |
| <i>FBL</i>       | 29.475  | 42.085  | 0.514  | 3.56E-07    | 9.88E-07    |
| <i>NOP14</i>     | 15.459  | 10.651  | -0.537 | 6.59E-18    | 1.28E-16    |
| <i>SNIP1</i>     | 3.748   | 2.567   | -0.546 | 1.11E-14    | 1.04E-13    |
| <i>SRSF5</i>     | 33.841  | 22.232  | -0.606 | 3.26E-17    | 5.21E-16    |

|                 |         |         |        |             |             |
|-----------------|---------|---------|--------|-------------|-------------|
| <i>TERT</i>     | 0.003   | 1.380   | 8.961  | 1.10E-24    | 1.23E-22    |
| <i>DCAF13</i>   | 2.002   | 3.838   | 0.939  | 5.09E-13    | 3.42E-12    |
| <i>POP1</i>     | 0.724   | 1.060   | 0.549  | 1.57E-09    | 6.02E-09    |
| <i>CDK9</i>     | 27.360  | 16.492  | -0.730 | 3.36E-18    | 7.05E-17    |
| <i>XRN1</i>     | 3.383   | 2.270   | -0.575 | 1.40E-13    | 1.07E-12    |
| <i>RRP12</i>    | 2.344   | 3.548   | 0.598  | 7.96E-08    | 2.46E-07    |
| <i>MRPS2</i>    | 28.667  | 19.046  | -0.590 | 8.75E-18    | 1.61E-16    |
| <i>RPL22L1</i>  | 7.440   | 16.275  | 1.129  | 2.44E-05    | 5.16E-05    |
| <i>RNASEH2A</i> | 2.802   | 9.420   | 1.749  | 1.45E-23    | 1.30E-21    |
| <i>RBM12B</i>   | 0.683   | 0.975   | 0.513  | 1.45E-08    | 4.98E-08    |
| <i>ESRP2</i>    | 15.543  | 8.862   | -0.811 | 2.46E-16    | 3.27E-15    |
| <i>RPP40</i>    | 2.456   | 3.672   | 0.580  | 4.34E-06    | 1.03E-05    |
| <i>CNOT6</i>    | 1.702   | 2.448   | 0.524  | 2.02E-08    | 6.81E-08    |
| <i>CNOT6L</i>   | 3.744   | 2.600   | -0.526 | 3.35E-13    | 2.35E-12    |
| <i>NAF1</i>     | 1.322   | 0.901   | -0.552 | 1.40E-15    | 1.53E-14    |
| <i>LRRFIP1</i>  | 8.750   | 5.619   | -0.639 | 1.34E-14    | 1.25E-13    |
| <i>EIF4E3</i>   | 1.986   | 0.885   | -1.166 | 2.50E-17    | 4.15E-16    |
| <i>CTU1</i>     | 1.138   | 1.715   | 0.592  | 0.000190529 | 0.000354405 |
| <i>GTPBP2</i>   | 3.891   | 7.358   | 0.919  | 2.13E-16    | 2.95E-15    |
| <i>DDX21</i>    | 14.727  | 9.748   | -0.595 | 9.41E-06    | 2.14E-05    |
| <i>RPL36A</i>   | 7.384   | 12.133  | 0.716  | 0.000132953 | 0.000252912 |
| <i>INTS6</i>    | 1.428   | 0.867   | -0.721 | 6.43E-15    | 6.22E-14    |
| <i>MRPS21</i>   | 27.437  | 44.581  | 0.700  | 1.20E-13    | 9.28E-13    |
| <i>SETD7</i>    | 8.620   | 5.792   | -0.574 | 8.49E-11    | 3.83E-10    |
| <i>EXO1</i>     | 0.103   | 1.148   | 3.481  | 1.20E-26    | 4.47E-24    |
| <i>NANOS1</i>   | 0.068   | 0.402   | 2.562  | 1.47E-12    | 9.08E-12    |
| <i>NANOS3</i>   | 0.044   | 0.104   | 1.259  | 0.03194867  | 0.042231361 |
| <i>LSM2</i>     | 15.584  | 24.226  | 0.636  | 2.23E-11    | 1.11E-10    |
| <i>RPP21</i>    | 2.390   | 4.220   | 0.820  | 5.44E-12    | 2.96E-11    |
| <i>IFIT1</i>    | 27.680  | 10.313  | -1.424 | 1.43E-07    | 4.30E-07    |
| <i>IFIT2</i>    | 12.632  | 6.377   | -0.986 | 0.002414325 | 0.003765898 |
| <i>IFIT5</i>    | 6.241   | 4.388   | -0.508 | 8.56E-10    | 3.40E-09    |
| <i>IFIT3</i>    | 24.024  | 11.613  | -1.049 | 0.015127358 | 0.02100935  |
| <i>PTCD1</i>    | 0.913   | 1.454   | 0.672  | 4.64E-10    | 1.90E-09    |
| <i>RPL8</i>     | 368.544 | 599.707 | 0.702  | 1.80E-13    | 1.33E-12    |
| <i>IMP3</i>     | 24.381  | 16.054  | -0.603 | 7.78E-18    | 1.47E-16    |
| <i>LIN28B</i>   | 0.000   | 0.446   | 10.660 | 0.00044499  | 0.000777141 |
| <i>R3HCC1</i>   | 13.928  | 9.020   | -0.627 | 5.46E-16    | 6.55E-15    |
| <i>MARS</i>     | 6.636   | 9.692   | 0.547  | 1.11E-12    | 7.04E-12    |
| <i>SF3B4</i>    | 18.205  | 35.069  | 0.946  | 1.39E-19    | 3.60E-18    |
| <i>LARP1</i>    | 13.155  | 18.848  | 0.519  | 9.69E-10    | 3.83E-09    |



|               |         |         |        |          |          |
|---------------|---------|---------|--------|----------|----------|
| <i>LARP1B</i> | 6.418   | 2.848   | -1.172 | 7.63E-25 | 1.02E-22 |
| <i>BAZ2B</i>  | 0.988   | 0.648   | -0.608 | 1.92E-13 | 1.41E-12 |
| <i>TST</i>    | 308.454 | 194.232 | -0.667 | 3.31E-12 | 1.91E-11 |
| <i>SETX</i>   | 5.127   | 3.549   | -0.530 | 2.17E-11 | 1.09E-10 |
